# Supplementary material
Source: Springer Nature journal article supplement (https://www.springermedizin.de/resource/supplementary/13024_2012_374_MOESM3_ESM.pdf/9643848)

A

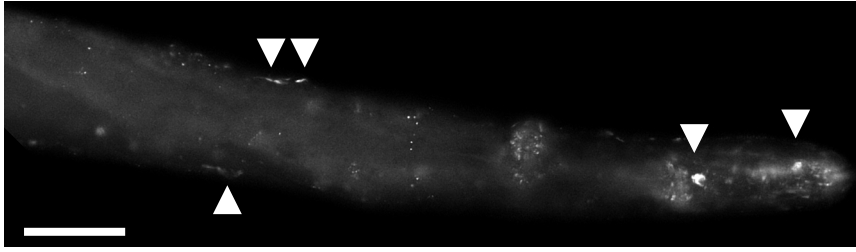

B

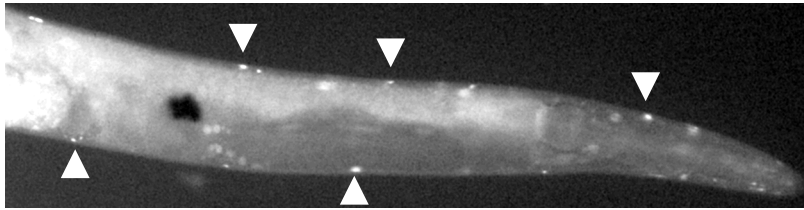

Supplement: MOESM3 [file 9643848]
